1 **The GalNAc-T Activation (GALA) Pathway: Drivers and Markers**

2

3

4 Authors:

5 Joanne CHIA<sup>1</sup>, Felicia TAY<sup>1</sup> and Frederic BARD<sup>1,2</sup>

6

7 Affiliations:

8 <sup>1</sup>Institute of Molecular and Cell Biology, 61 Biopolis Drive, Singapore 138673

9 <sup>2</sup>Department of Biochemistry, National University of Singapore, 21 Lower Kent Ridge Road, Singapore 119077

10

11

12 \*Corresponding Author:

13 Email: [fbard@imcb.a-star.edu.sg](mailto:fbard@imcb.a-star.edu.sg)

14 Tel: +65 6586 9585

15 Fax: +65 6779 1117

16

17

18

19 **Abstract**

20

21 The enzymes GALNTs add GalNAc sugar to Ser and Thr residues, forming the Tn glycan. GALNTs are activated  
22 by trafficking from Golgi to ER, a process driven by the Src kinase and negatively regulated by ERK8. This  
23 GALNTs activation (aka GALA) pathway induces high Tn levels and is a key driver of liver tumor growth.  
24 Recently, Tabak and colleagues have contested our previous data that EGF stimulation can induce GALNTs  
25 relocation. Here, we show that relocation induced by EGF is actually detectable in the images acquired by Tabak et  
26 al. Furthermore, we show that expression of EGFR enhances relocation and appears required to drive relocation  
27 induced by ERK8 depletion. We also propose that quantification of O-glycosylation of the ER resident protein  
28 PDIA4 provides an alternative measure of GALA. In sum, we demonstrate that non-reproducibility was due to  
29 experimental errors, that EGFR is indeed a driver of GALA and propose additional markers to facilitate the study of  
30 this pathway.

## 31 **Introduction**

32

33 Replicability is essential to the scientific progress and has been the subject of intense debate in recent years. In  
34 biomedical sciences, some authors have argued that a large fraction of scientific studies are unreproducible, calling  
35 into question the value of discoveries and initiating a fierce debate [1–3].

36 In a study posted on BioRxiv and later published, Tabak and colleagues questioned the replicability of findings we  
37 published in 2010 and the physiological relevance of the GALNTs Activation (GALA) pathway [4]. In the 2010  
38 paper, we proposed that GALNTs enzymes are regulated through trafficking from the Golgi to the ER. We showed  
39 that this relocation is induced by the tyrosine kinase Src. We further proposed that stimulation of cells by growth  
40 factors such as EGF and PDGF is able to induce this relocation, consistent with one proposed mode of activation of  
41 Src. We showed evidences that the Arf1-COPI machinery responsible for Golgi to ER traffic is involved in this  
42 relocation. Furthermore, we showed evidences that GALNTs are active in the ER and that their activity is stimulated  
43 by the relocation, constituting a potent mechanism to control O-glycosylation, which we named the GALA pathway.  
44 O-GalNAc glycosylation occurs on thousands of secreted and cell surface proteins and is essential for multicellular  
45 life [5–8]. O-glycans are built by the sequential addition of simple sugars. GALNTs initiate the sequence by adding  
46 an N-Acetylgalactosamine (GalNAc) to a Ser or Thr residue. The resulting structure is called the Tn antigen and  
47 recognised by lectins such as VVL and HPL. Tn is usually a biosynthetic intermediate that is modified by the  
48 addition of other sugars such as galactose by the enzyme C1GALT [9]. Further extension can result in more  
49 complex O-glycans. Tn can also be sialylated by sialyl-transferases, producing Sialyl-Tn, which is not further  
50 modified [10].

51 The formation of Tn has received a lot of attention from glycobiologists because malignant tumors have long been  
52 reported to have dramatically increased levels of Tn [11,12]. The phenotype is shared by most types of solid  
53 malignant tumors and occurring at a frequency of 70-90%, begging the question of its underlying molecular  
54 mechanisms and role in tumor biology. A proposed mechanism is that cancer cells lose the activity of the Tn  
55 modifying enzymes, in particular through mutations or loss of expression of its X-linked dedicated chaperone called  
56 Cosmc [13]. The selective advantage of short O-glycans for tumor cells is not clear, albeit they could interact with  
57 endogenous lectins such as Galectins and promote signaling events [14]. Studies have documented that short O-  
58 glycans can induce oncogenic features [15]. However, mutations of Cosmc have been reported to be extremely rare  
59 [15,16] and recent studies have shown that loss of C1GALT activity slows tumor progression in a mammary tumor  
60 model [17].

61 In our 2010 paper, we proposed that an alternative mechanism can also drive high Tn: the relocation of GALNTs to  
62 the ER induces an accumulation of Tn in this organelle. Since the ER tends to mesh the whole cytoplasm, the result  
63 is an increase of total cellular staining detectable by lectin-based histochemistry [4]. Importantly, we have not  
64 detected other O-glycans in the ER so far, suggesting that GalNAc is not modified by C1GALT and other extension  
65 enzymes. As the ER is much larger than the Golgi with a high content of proteins, the abundance of substrate and  
66 the lack of Tn modification can yield large increases in Tn levels when enzyme relocation is marked.

67 In a subsequent study, using VVL staining fluorescence imaging and quantitative analysis on tissue microarrays, we  
68 evaluated Tn levels increase to be up to 10 to 15 folds in human breast cancer tissues [18]. We showed that the

69 pattern of Tn staining in these samples is consistent with an ER localisation [18]. Furthermore, expressing an ER-  
70 targeted form of GALNT2 or T1 in cell lines such as HeLa, MDA-MB-231 and HepG2, is sufficient to induce a 6 to  
71 10 fold increase of total HPL staining intensity [4,18,19]. By contrast over-expressing the wild-type form of the  
72 enzyme has no or very limited effects on Tn. More recently, we have shown that relocation is also occurring in a  
73 majority of liver cancers in humans and in mice [19]. Expressing an ER-targeted GALNT1 in this tumor model  
74 strongly accelerates tumor growth. Together, these data suggest that GALNTs relocation to the ER has a selective  
75 advantage for tumor cells and is the main mechanism driving Tn increase in breast and liver tumors.

76 How is the relocation process controlled? An RNAi screening approach revealed that GALNTs relocation is under  
77 the control of a complex genetic network. Upon depletion of a number of genes, Tn cellular staining significantly  
78 increases. 12 different genes were validated [20]. In the case of the Ser/Thr kinase ERK8, Tn levels increase ranged  
79 from 6 to 15 folds depending on the experimental context. This study suggested that there might be many different  
80 mechanisms able to induce the relocation of GALNTs, which is highly dependent on the status of the intracellular  
81 signalling network. We found various evidences that pathways downstream of stimulation by growth factors such as  
82 EGF and PDGF are able to activate GALNTs [4,20]. However, stimulation by EGF and PDGF itself produces a  
83 relatively moderate relocation.

84 In their study, Tabak and colleagues used EGF and PDGF stimulation and GALNTs staining and reported that they  
85 could not observe a decrease GALNTs colocalisation with a Golgi marker or increase of colocalisation with an ER  
86 marker.

87 In the intervening months, we have gone back to our initial study and data sets, repeated several experiments and  
88 analysed raw data acquired by Herbomel et al. and shared during the process of publishing their study. We could  
89 confirm that EGF and PDGF stimulation does induce changes in the pattern of Tn and GALNT staining. We  
90 observed that these experiments are sensitive to culture conditions, in particular to FBS. We also found that, albeit  
91 moderate, the relocation was present in the images acquired by Herbomel but could not be quantified by the  
92 analytical method they chose. Finally, we show that EGFR expression enhances relocation and present a new marker  
93 to facilitate the modeling and measurement of the GALNT relocation process in vitro and in vivo.

94 **Results**

95

96 **Batch differences in FBS affect growth factor response**

97 While we were analysing the causes of discrepancy between our results and those of Tabak's group, we considered  
98 the possible influence of cell lines and culture conditions. HeLa cell lines are known to be highly variable [21].

99 However we had sent our cells to the NIH and it did not seem to improve their experiments.

100 We grow HeLa cells with 10% Fetal Bovine Serum (FBS) which contains various growth factors and cytokines.

101 Before growth factor stimulation, the cells were washed twice with PBS before overnight starvation in serum-free  
102 media. Over the years, we observed that different batches of FBS can have an effect on basal levels of Tn. We tested

103 whether, despite the washing step, two different batches of FBS could affect the experiment. With one batch of FBS

104 (FBS1), we were able to observe an increase of 1.5 to 2 fold in Tn levels after 6h of EGF stimulation and to a lower  
105 extent with PDGF treatment (Fig 1A, 1B). However, we were surprised to find that when grown with another batch

106 (FBS2), the effect of EGF or PDGF was minimal to sometimes undetectable (Fig 1C, 1D). Thus, contrary to  
107 expectation, washing and overnight FBS starvation does not completely erase the effect of previous growth

108 conditions and can lead to a lack of response to EGF or PDGF. This sensitivity to culture conditions might partly  
109 explain the results reported by Herbomel et al.

110

111 **ERK1/2 phosphorylation is not a good control for Src activation**

112 We next repeated the same experiment to measure the levels of total phosphotyrosine and Src activation after EGF  
113 stimulation. Consistent with the results with GALA, we observed that FBS1 induced a marked activation of Src,

114 while FBS2 had a very limited effect (Figure 1E). In their publication, Herbomel et al. used the phosphorylation of

115 ERK1/2 as a positive control for EGF stimulation [22]. In our test, we observed that FBS2 was able to induce a clear  
116 activation of ERK1/2, even when activation of Src was undetectable (Figure 1E).

117

118 **Image analysis can significantly affect GALA quantification**

119 Herbomel et al. used confocal imaging at high magnification with extensive sectioning (61 slices). As previously  
120 noted in our commentary of their study, this extensive sectioning can have two effects detrimental for detection of

121 GALNTs relocation: it prevents the visualisation of weak signal and is prone to bleaching the weak signal  
122 originating from the ER [23]. Dr. Tabak had shared the images used in their publication with us. To improve the

123 detection of weak signal, we generated a maximal intensity projection of their confocal stack then used grayscale  
124 inversion to better visualise the out-of-Golgi signal. It then became clear that in the images acquired by Herbomel,

125 the redistribution of GALNTs is clearly visible (Figure 1E).

126 We next wondered why the image quantification protocol used did not detect any change. We realised that the  
127 analytical method chosen was inadequate to quantify relocation. The Manders coefficient ("M2") used to quantify

128 relocation measures the fraction of the Golgi marker (TGN46) colocalising with HPL or GALNT [22]. Since a  
129 significant fraction of GALNT remains at the Golgi after EGF stimulation, the fraction of TGN46 that colocalises

130 with GALNT is unchanged. It is important to note that Manders coefficient is not sensitive to changes in staining

131 intensities, so the M2 coefficient is not affected by a decrease in GALNT intensity. In opposition to M2, the M1  
132 coefficient measures the fraction of GALNT that colocalises with TGN46.

133 We used Herbomel's images to re-run the Manders coefficient analysis and found that indeed M2 did not register  
134 any effect; but the M1 coefficient showed a significant decrease (Fig 1G, S1C). We also applied the Manders  
135 coefficient measure on our own images and obtained similar results: no effect was detected using M2, and  
136 significant effect was detected using M1 (Figure S1A, S1B).

137 We could not perform the same analysis on all the images provided by Tabak's group as some of them display  
138 inconsistent total intensity levels. There is generally lower intensities in the images of EGF stimulated cells. This is  
139 apparent in the staining of ER marker calnexin (CANX), whose levels do not change (Fig S1D, S1E). Given that Tn  
140 measures the GALNT enzyme activity levels, total Tn intensity levels are important to make comparison across  
141 treatments. We ensured that there is equal intensity levels across treatments shown in Fig 1F and found the ER  
142 marker levels to be similar in the three images (Fig S1E).

143 We conclude that the lack of effect reported by Herbomel et al. is due to their image analysis methods and  
144 acquisition settings.

145

#### 146 **EGFR levels strongly affect GALA response to EGF stimulation**

147 Our previous results collectively indicate that EGFR is a regulator of GALA. But levels of expression of this  
148 receptor are known to vary extensively; this could explain why EGF stimulation is sometimes not very effective. We  
149 thus transfected HeLa cells with EGFR, then stimulated them with EGF. This led to a marked increase in Tn levels  
150 of more than 6 fold on average (Fig 2A, 2B). The effect was relatively variable between cells, with up to 20 fold  
151 increase after 4h EGF stimulation in some cells (Fig 2B). Thus, EGF stimulation can clearly increase GALA levels  
152 and this is highly dependent on the levels of EGFR.

153

#### 154 **ERK8 depletion induces a marked relocation of GALNTs**

155 EGF stimulation effect on the intracellular distribution of GALNTs requires optimal conditions of imaging. In many  
156 cases, GALNTs staining in the ER is weak and difficult to detect (Fig 2C). This is a consequence of the high  
157 dispersion effect of relocation. The ER is a much larger organelle than the Golgi and is distributed over the whole  
158 cytoplasm, so the GALNT signal is highly diluted. Because Tn is a more abundant antigen and its levels increase  
159 after relocation, its staining can be more easily detected in the ER (Fig 2C). We find that, albeit it is indirect,  
160 measuring total levels of Tn is a more reliable and sensitive approach to quantify relocation.

161 We previously reported that ERK8 depletion induces the redistribution of GALNTs to the ER, quantified via  
162 measurement of colocalization with the ER marker Calreticulin [20]. Here, we directly compared EGF stimulation  
163 effects with ERK8 depletion (Fig 2C, 2D, 2E). While EGF stimulation induces a 2-fold increase in Tn staining,  
164 ERK8 depletion increased signal by 10-fold (Fig 2E). This difference in magnitude is reflected at the Tn and  
165 GALNTs level. Upon ERK8 depletion, there is a clear decrease of GALNT1 at the Golgi after ERK8 depletion (Fig  
166 2D). We verified by western blot that GALNT1 protein levels remain constant (Fig S2A). Thus the decrease  
167 observed is due to the protein dispersion in the ER.

168

169 **GALA activation by ERK8 depletion involves EGFR signaling**

170 We previously reported that growth factor stimulation leads to displacement of ERK8 from Golgi membranes [20].  
171 Here, we tested if ERK8 depletion leads to activation of a tyrosine kinase at the Golgi level. We labeled ERK8  
172 depleted cells with a phospho-tyrosine antibody, PY20 (Fig 2F). Phosphotyrosine staining increased at the Golgi  
173 level by about 3-fold (Fig 2G). This is highly reminiscent of the effect of Src activation at the Golgi [25].  
174 Furthermore, treating cells with the Src family tyrosine kinase inhibitor PP2 significantly reduced Tn levels (Fig 2H,  
175 S2B). This data indicates that a tyrosine kinase has been activated upon ERK8 depletion. We next treated ERK8  
176 depleted cells with the EGFR inhibitor AG-1478 and found that it reduced Tn levels by at least 40% (Fig 2I, S2C).  
177 This result indicates that EGFR signaling is at least partially required to mediate the effects of ERK8 depletion.  
178 We finally tested how general is ERK8 negative regulation of GALA, we repeated the knockdown in two other cell  
179 lines. SKOV3 is a cell line originating from an ovarian cancer, with epithelial characteristics. ERK8 depletion led to  
180 an 8 fold increase in Tn levels in these cells (Fig S2D, S2E). By contrast, knockdown in HepG2, an hepatocellular  
181 carcinoma, did not induce significant GALA. Thus ERK8 negative regulation of GALA is cell type dependent.

182

183 **Tn levels increase after EGF stimulation are due to GALNT1/2 activity**

184 HPL and VVL stainings have been associated with structures alternative to Tn. A concern of Dr. Tabak during our  
185 exchange of emails was that we were using HPL or VVL staining instead of relying only on GALNTs. We thus  
186 performed a double knock-down of GALNT1 and 2, the main GALNTs expressed in Hela cells [24]. Depleting them  
187 completely abrogated the increase in Tn induced by EGF (Fig 3A, 3B).

188

189 **GALA effect can be quantified through punctate structures where ERGIC53 and GALNTs colocalise**

190 As reported in 2010, GALNT staining reveals increased punctate structures at the periphery of the Golgi after 4  
191 hours of EGF stimulation [4]. These structures partially colocalized with ER-to-Golgi intermediate compartment  
192 (ERGIC) marker ERGIC53. Colocalization of GALNT and ERGIC53 could thus in theory be used to measure  
193 GALA activation. As the two markers appear to overlap only in a fraction of vesicular structures, we employed  
194 object-based colocalization analysis that considers each subcellular object as a unique structure. Traditional  
195 colocalization methods with Pearson's or Mandel's correlation analysis considers global estimation of the entire  
196 image and hence would not be informative in this case [26]. By setting a fixed threshold to distinguish objects from  
197 noise and background in each staining, the intensity centres of each subcellular structure is determined. A particular  
198 structure shows colocalisation if the distance between the centres is less than the imaging resolution. The percentage  
199 of structures colocalising in both GALNT and ERGIC53 images was calculated. Using this analysis method, we  
200 observed about 14-fold increase in the the population of ERGIC53 structures colocalizing with GALNT1 at four  
201 hours post EGF treatment in cells expressing EGFR (Fig 3C, 3D).

202

203 **The ER resident protein PDIA4 is a reliable marker of GALA activation.**

204 As discussed above, microscopy imaging to quantify GALA can present certain technical limitations. However, the  
205 relocation of GALNTs to the ER also induces measurable biochemical changes. We recently identified PDIA4 as a

206 resident ER protein that gets hyperglycosylated upon GALA activation. PDIA4 is hyperglycosylated in tumors that  
207 show increased levels of Tn [19].

208 When Hela cells were stimulated with EGF, we found that PDIA4 glycosylation increased between ~~two~~ and three  
209 fold. After transient over-expression of EGFR and stimulation by EGF, it was stimulated by nearly 4-fold (Fig  
210 3E,3F). We also measured PDIA4 glycosylation upon ERK8 depletion in HeLa cells and, consistent with our  
211 previous observations, obtained a robust, ~6-fold increase in levels (Fig 3G, 3H). To demonstrate that this change in  
212 the glycosylation status of PDIA4 is indeed dependent on GALNTs, we proceeded to deplete GALNT1 and  
213 GALNT2 with siRNA. We found that the increased O-glycosylation of PDIA4 in EGF stimulated cells was  
214 abolished (Fig 3I). This set of results indicate that PDIA4 is hyper-glycosylated after growth factor stimulation,  
215 confirming the relocation of GALNTs from Golgi to ER.



## 216 **Discussion**

217

218 Factors influencing the reproducibility of molecular biological studies are unfortunately varied and numerous. Even  
219 cell lines in culture are complex and variable systems with genetic drift and components poorly defined such as  
220 FBS. In this study, we have sought to understand why Tabak and colleagues claim that they were not able to  
221 reproduce our findings published in 2010. We identified two answers. One is linked to a potential source of  
222 variability in these experiments: FBS batches. We found that the batch of FBS used to grow cells can significantly  
223 affect GALA response. Effects of FBS batch on signaling are well documented and unfortunately hard to control  
224 [27]. Herbomel controlled for EGF effect by probing for ERK1/2 activation, not for total tyrosine phosphorylation  
225 nor Src activation. It is thus possible that they used cell culture conditions unfavorable for Src activation, which is a  
226 key driver of GALA. As they did not test for this, it is not possible to conclude with certainty.

227 The second answer is less hypothetical and more surprising: Herbomel et al. did in fact obtain relocation of the  
228 GALNTs in their experiments. Using the original raw images shared by them, we found that by changing the display  
229 method, the dispersion of GALNTs becomes clearly visible. Furthermore, we found that the image analysis protocol  
230 they followed would never have allowed detection of the relocation. Adjusting this protocol with the correct  
231 parameters, we were able to quantify GALA effect on GALNT1, GALNT2 and Tn staining in the images they  
232 acquired.

233 Scientists often bring their own preconceived ideas to the bench. It is possible that part of the confusion in Tabak's  
234 group arose from the fact that GALA is not an on/off system, but rather a rheostat-type regulatory process. This is in  
235 contrast with other signaling events such as activation of ERK1/2, which tends to function rather as an on/off switch.  
236 In cells stimulated by growth factors, GALA activation can be relatively moderate, especially in contrast with the  
237 situation in tumor cells in situ. GALA levels tend to correlate with the levels of activation of tyrosine kinases as  
238 evaluated by phospho-tyrosine levels. Src (or related tyrosine kinases) activation after EGF stimulation tends to be  
239 weaker than ERK1/2 (see for instance [28]). GALA response also varies between cell lines. For instance, HEK293T  
240 responded with marked increase in phospho-tyrosines as detected by PY20 antibody as well as increase in Tn levels  
241 and Tn modification of PDIA4. By comparison, HeLa response was weaker both at the PY20 and PDIA4 Tn levels.  
242 As with FBS conditions, controlling for tyrosine kinases (Src and EGFR) activation levels is critical to understand  
243 the levels of GALA.

244 An active form of Src strongly induce the GALNTs relocation process, an observation that could be reproduced by  
245 Tabak's group (e-mail communication). A complication here is that too strong or too long a Src activation can also  
246 lead to Golgi fragmentation, especially in HeLa and other epithelial derived cell lines, as previously reported [29].  
247 This can potentially muddle the measurement of relocation. For unknown reasons, Src activation induces more  
248 limited fragmentation in fibroblasts cell lines such as WI-38 or mouse embryonic fibroblasts such as the SYF cell  
249 line. In cells that express high levels of Src, a very clear segregation of GALNTs from other enzymes is then clearly  
250 observable [4].

251 By comparison with the growth factor stimulation experiment, our data indicate that GALA is more strongly  
252 activated in most human breast and liver tumors. Obviously, this is the relevant context in which to consider this  
253 pathway. Are growth factors important *in vivo*? This is not clear at this stage. High levels of EGFR expression and



254 activity are known to be associated with many different tumors, including breast [30] and liver [31]; so this receptor  
255 could potentially drive relocation in the pathological context. Src activity is strongly activated with many malignant  
256 transformation, so this could be a frequent (but not exclusive) driver of GALA in tumors [32]. In fine, most tumors  
257 display much higher levels of Tn than normal tissues and we propose that it is due most of the time to significant  
258 GALA activation. Now, this claim can be relatively easily assessed by biochemical analysis of the glycosylation  
259 status of the ER resident protein PDIA4.

260 In a world increasingly concerned with scientific reproducibility, it is equally important to recognize the challenges  
261 when attempting reproduction [33]. The complexity of biological systems make a full control of experimental  
262 parameters difficult while modern cell biology techniques can be challenging to master. In our own group, genome  
263 editing by CAS9-CRISPR was not 'reproducible' for months. Hopefully, the clarifications provided in this study  
264 will help other researchers who wish to study the GALA pathway to address its significance in tumor progression.

265 **Materials and methods**

266

267 **Cell culture**

268 Hela cells were obtained from ATCC. Skov-3 cells were a gift from E. Chapeau. Both Hela and Skov-3 cells were  
269 grown in DMEM supplemented with 10% fetal bovine serum (FBS). HEK293T cells were a gift from W. Hong  
270 (IMCB, Singapore) and were grown in DMEM supplemented with 15% FBS. All cells were grown at 37°C in a 10%  
271 CO<sub>2</sub> incubator.

272

273 **Reagents used in study**

274 Recombinant human epidermal growth factor EGF (#SRP3027) was purchased from Sigma aldrich. PDGF-BB  
275 Recombinant Human Protein (#PHG0046), *Helix pomatia* Lectin A (HPL) conjugated with 647-nm fluorophore  
276 (#L32454) and anti-GFP (#A11122) were purchased from Thermo Fisher Scientific. Anti-Giantin (#ab24586), anti-  
277 actin (#ab8227), anti-PDIA4 (#ab155800) antibodies were purchased from Abcam. Anti-pY416-Src (#2101), anti-  
278 Src (#2109), anti-pY-ERK1/2 (#4377), anti-ERK1/2 (#4695) antibodies were purchased from Cell Signaling  
279 Technology, Inc. Biotinylated Vicia Villosa Lectin (VVL; #B-1235) and agarose bound VVL (#AL-1233) were  
280 purchased from Vector Laboratories, Inc. Anti-phosphotyrosine clone PY20 (#05-947) and anti-phosphotyrosine  
281 clone 4G10 (#05-321) were purchased from Merck Millipore. Fetal bovine serum (FBS1; Gibco #10500-064 and  
282 FBS2 Gibco #16140-071) were purchased from Thermo Fisher Scientific.

283 Mouse anti-GALNT1 antibody in hybridoma supernatant was a gift from H. Clausen (University of Copenhagen,  
284 Denmark). GFP tagged epidermal growth factor receptor (EGFR) was a gift from W. Hong. siRNAs were purchased  
285 from Dharmacon, Inc.

286 EGFR inhibitor AG-1478 (#S2728) was purchased from Selleckchem. Src family kinase inhibitor PP2 (#529573)  
287 was purchased from Merck Millipore.

288

289 **Cell transfection, growth factor stimulation and drug treatments**

290 Plasmid transfection in Hela cells and HEK293T cells were performed with Fugene HD (Promega) and  
291 Lipofectamine 3000 (Thermo Fisher Scientific) respectively. Cells were transfected for at least 24 hours before  
292 further manipulations. siRNA transfection was described in detail in [34]. Briefly, 5µl of 500nM siRNA was mixed  
293 with 0.4µl of Hiperfect (Qiagen, #301705) and 14.6µl of Optimem (per well) for 20 min complexation, followed by  
294 the addition of 8000 cells to the transfection mix.

295 For growth factor stimulation, cells were washed twice using Dulbecco's phosphate-buffered saline (D-PBS) before  
296 overnight serum starvation in serum-free DMEM. Human recombinant EGF (100 ng/ml; Sigma-Aldrich) or mouse  
297 recombinant PDGF-bb (50 ng/ml; Invitrogen) were added for various durations before fixation with  
298 paraformaldehyde or lysed with RIPA lysis buffer.

299 For drug treatments, drugs were prepared by reconstituting in DMSO in concentrated stock solutions. The drugs or  
300 DMSO control were diluted in media containing 10% FBS and added to cells for 6 hours (AG-1478) or 24 hours  
301 (PP2) before fixation.

## 302 **Immunofluorescence (IF) microscopy**

303 For automated imaging, Hela cells were seeded in a 96-well clear and flat-bottomed black imaging plate (Falcon,  
304 #353219) and incubated overnight at 37°C and 10% CO<sub>2</sub> before growth factor stimulation or plasmid transfection.  
305 IF staining procedures was performed as reported in [4,35]. Cells were washed once with D-PBS before fixation  
306 with 4%-paraformaldehyde -4% sucrose in D-PBS for 10 minutes. Cells were washed once with D-PBS and  
307 permeabilised with 0.2% Triton-X for 10 minutes before the addition of primary antibody in blocking buffer 2%  
308 FBS in D-PBS. After primary antibody incubation, cells were washed with blocking buffer for 3 times and  
309 subsequently stained for 20 minutes with 2 µg/ml HPL, 5 µg/ml secondary Alexa Fluor–conjugated antibody and 1  
310 µg/ml Hoechst (Invitrogen) in blocking buffer. Cells were then washed for 3 times with D-PBS before imaging.  
311 During automated image acquisition, nine sites per well were acquired sequentially with a 20X magnification Plan  
312 Fluor on automated imaging system (ImageXpress MICRO [IXM], Molecular devices, LLC). At least three replicate  
313 wells for each condition was performed.

314 For high resolution microscopy, cells were seeded onto glass coverslips in 24-well dishes (Nunc, Denmark). The  
315 procedures for IF staining were the same as described above. To observe phosphotyrosine staining, the cells were  
316 permeabilized with 0.2% Triton-X for 2 hour at room temperature and stained with anti-phosphotyrosine clone  
317 PY20 antibody diluted in 2% FBS in D-PBS overnight. Cells were mounted onto glass slides using FluorSave  
318 (Merck) and imaged with immersol oil using an inverted confocal microscope (Zeiss LSM800) at 40X, 60X or 100X  
319 magnification.

320

## 321 **Quantification of Immunofluorescence (IF) Staining**

322 Image analysis of HPL intensity of images acquired on IXM was performed using MetaXpress software (version  
323 5.3.0.5). For each well, total HPL staining intensity and nuclei number was quantified using the ‘Transfluor HT’  
324 application module in the software. Hundreds of cells from at least three wells per experiment were quantified. Two  
325 experimental replicates was performed.

326 Image analysis of phosphotyrosine levels at the Golgi were quantified using the ‘Translocation-enhanced’  
327 application module in the software whereby the intensity of PY20 staining within the Golgi area (demarcated by  
328 Giantin staining) per cell was quantified. Hundreds of cells from at least three wells per experiment were quantified.  
329 Two experimental replicates was performed.

330 For ImageJ analysis of HPL intensities, images were exported as 16-bit TIFF files. A fixed threshold for a mask on  
331 the HPL channel was set and the total intensity per image was calculated based on the total pixel count multiplied by  
332 the intensity per pixel. The HPL intensity per cell was then obtained by normalising the total image intensity with  
333 the nuclei count.

334 For analysis of Mander’s coefficient, the images were analysed with ImageJ plugin (Just Another Colocalization  
335 Plugin, JACOP). A fixed threshold to distinguish from background signal was set on both HPL and Golgi channels  
336 for all images and the corresponding fraction of HPL coincident with Golgi channel (“M1”) and fraction of Golgi  
337 coincident with HPL (“M2”) was then used to quantify the colocalization between the markers.

338 Tabak's group provided one representative image stack from each experimental condition in .nd2 file format. Each  
339 image stack comprise of a z-stack of 61 images for each channel. Each image contains 3-4 cells acquired at 60x  
340 magnification. To analyse images provided by Tabak's group, an ImageJ plugin (Nikon ND2 Reader) was used to  
341 export z-stacks of each channel in .avi format. The Mander's coefficient was analysed with JACOP using the z-  
342 stacks from different channels whereby a fixed threshold was set for each of the two channels in the set of images  
343 within the same experiment. The maximum projection of the z-stack was presented in the figures.  
344 Image analysis of phosphotyrosine levels at the Golgi were quantified using the 'Translocation-enhanced'  
345 application module in the software whereby the intensity of PY20 staining within the Golgi area (demarcated by  
346 Giantin staining) per cell was quantified.  
347 For object-based colocalization analysis of ERGIC53 and GALNT1 punctate structures, a fixed threshold for each of  
348 the channels was set to distinguish discrete objects and from background noise. The intensity centres of each  
349 discrete objects i.e. centroids of each channel was calculated in the ImageJ plugin (JACOP). Two objects were  
350 considered to colocalise if the distance between their centroids was less than the resolution of the microscope used  
351 and the percentage of the objects in the ERGIC53 channel colocalizing with objects in the GALNT1 channel was  
352 calculated for each cell.

353

#### 354 **Lectin immunoprecipitation (IP)**

355 Cells were washed twice with ice-cold D-PBS before lysis with RIPA lysis buffer containing protease and  
356 phosphatase inhibitor (Roche). The protein concentrations of clarified cell/ tissue lysates were measured using the  
357 Bradford reagent (Bio-Rad) and normalised across samples. At least 1mg of total lysate was incubated with VVL-  
358 conjugated beads for overnight at 4°C. The beads were washed at least three times with RIPA lysis buffer, before  
359 the precipitated proteins were eluted in 2x LDS sample buffer with 50mM DTT by boiling at 95°C for 10 minutes.  
360 The samples were resolved by SDS-PAGE electrophoresis using bis-tris NuPage gels as per the manufacturer's  
361 instructions (Thermo Fisher Scientific) and transferred to nitrocellulose membranes. Membranes were then blocked  
362 using 3% BSA dissolved in Tris buffered saline with tween (TBST: 50 mM Tris [pH 8.0, 4°C], 150 mM NaCl, and  
363 0.1% Tween 20) for 2 hours at room temperature before incubation with lectin or antibodies overnight. Membranes  
364 were washed at least three times with TBST before incubation with secondary HRP-conjugated antibodies (GE  
365 Healthcare). Membranes were further washed at least three with TBST before ECL (GE Healthcare) exposure.

366 **Legends**

367

368 **Fig 1. FBS type affects GALA activation while image display and analysis techniques affect interpretation of**  
369 **GALA activation following growth factor stimulation.**

370 *Helix pomatia* lectin (HPL) staining of HeLa cells grown in (A) FBS1 and (C) FBS2 over time of EGF treatment  
371 (100 ng/ml). Images were acquired on ImageXpress Micro (IXM) at 20X magnification (air). Scale bar: 30  $\mu$ m. HPL  
372 staining intensity of cells grown in (B) FBS1 and (D) FBS2 over time with 100 ng/ml EGF or 50 ng/ml PDGF  
373 stimulation. HPL intensity was analysed using the ‘Transfluor HT’ module of MetaXpress software (Molecular  
374 Devices) using the method described in [35]. Statistical significance (p) measured by two-tailed paired t test. \*, p <  
375 0.05 and \*\*, p < 0.01 relative to mean HPL staining in unstimulated serum starved cells (0 h). NS, not significant.  
376 (E) Immunoblot analysis of HeLa cells grown in FBS1 and FBS2 and were stimulated with 100 ng/ml EGF over 4  
377 hours. Src and ERK1/2 activation and phosphotyrosine levels were analysed by western blotting (F) Maximum  
378 projection of a z-stack of 61 images from representative images provided by Herbomel et al. Each image was  
379 acquired at 60X magnification. HeLa cells were stimulated with EGF and PDGF for 4 hours and 3 hours  
380 respectively. Scale bar: 5  $\mu$ m. (G) Quantification of Mander’s coefficient of GALNT1 and Golgi marker TGN in (F).  
381 M1 represents the fraction of GALNT1 staining overlapping the Golgi and M2 represents the fraction of Golgi  
382 overlapping GALNT1 staining. Only M2 results were presented in Herbomel et al.

383

384 **Fig 2. Drivers of GALA: EGFR expression and ERK8 depletion induce more acute GALA activation**

385 (A) Cells transfected with EGFR-GFP stimulated with 100 ng/ml EGF for 4 hours (60X magnification). Scale bar:  
386 10  $\mu$ m. (B) Quantification of HPL intensity per cell that were untransfected (blue) or transfected with EGFR-GFP  
387 (green) from two independent experiments. At least 30 cells were quantified for each condition. Statistical  
388 significance (p) measured by two-tailed paired t test. \*, p < 0.05 and \*\*\*, p < 0.001 relative to mean HPL staining in  
389 unstimulated cells (0 h). NS, not significant. Representative images of HeLa cells stimulated with (C) 100 ng/ml EGF  
390 for 6 hours (D) ERK8 knockdown (“siERK8”) and stained with HPL and GALNT1. Images were acquired at 100x  
391 magnification under immersol oil. Scale bar: 10  $\mu$ m. (E) Quantification of HPL intensity of EGF stimulated (blue)  
392 and ERK8 depleted cells (grey) using ImageJ analysis. \*\*\*, p < 0.001 relative to mean HPL staining in  
393 corresponding unstimulated cells (0h) or non-targeting siRNA (“siNT”) cells. (F) Phosphotyrosine staining (pY20)  
394 of HeLa cells treated with “siNT” or siERK8” (100X magnification). Scale bar: 10  $\mu$ m. (G) Quantification of pY20  
395 staining intensity in the Golgi region of siNT or siERK8 treated cells using the ‘Translocation-enhanced’ module on  
396 MetaXpress. Images (20X magnification) were acquired on IXM. Statistical significance (p) measured by two-tailed  
397 paired t test. \*\*\*, p < 0.001 relative to siNT cells. (H) Quantification of HPL intensity of siERK8 treated with  
398 DMSO control or 10  $\mu$ M Src family kinase inhibitor PP2 for 24 hours (See images in S2B). “siERK8 single” refers  
399 to single siRNA while “siERK8 pooled” refers to a pool of 4 different siRNAs. Statistical significance (p) measured  
400 by two-tailed paired t test. \*\*\*, p < 0.001 relative to siNT-DMSO control. (I) HPL staining intensity of siERK8  
401 treated with 10  $\mu$ M EGFR inhibitor AG-1478 or DMSO control. Statistical significance (p) measured by two-tailed  
402 paired t test. \*\*p<0.01 relative to siERK8-DMSO control cells. (see images in Fig S2C)

403

404 **Fig 3. Markers of GALA: O-glycosylation ER resident protein PDIA4 is a reliable marker of GALA**  
405 **activation.**

406 (A) HPL staining of GALNT1 and GALNT2 siRNA (“siGALNT1+T2”) and siNT treated cells over time of EGF  
407 stimulation. Scale bar: 30  $\mu$ m. (B) Quantification of HPL intensity in (A). Statistical significance (p) measured by  
408 two-tailed paired t test. \*, p < 0.05, \*\*, p<0.01 and \*\*\*, p < 0.001 relative to unstimulated cells (0h). NS, not  
409 significant. (C) GALNT1 and ERGIC53 staining in EGFR expressing cells unstimulated or stimulated with 100  
410 ng/ml EGF for 4 hours (100X magnification). Scale bar: 5  $\mu$ m. (D) Quantification of the percentage of ERGIC53  
411 intensity centres colocalizing with GALNT1 centres. Statistical significance (p) measured by two-tailed paired t  
412 test.\*\*\*, p < 0.001 relative to untreated cells. (E) Immunoblot analysis of VVL IP on HeLa cells expressing EGFR or  
413 GFP control that were stimulated with 100 ng/ml EGF over the indicated durations. (F) Levels of Tn modified  
414 endogenous ER resident PDIA4 in EGFR or GFP expressing cells over time of EGF stimulation in (E) from 2  
415 independent experiments. (G) Immunoblot analysis of the levels of Tn modified PDIA4 in HeLa cells treated with  
416 siNT or siERK8. (H) Levels of Tn modified endogenous ER resident PDIA4 in (G) from 3 independent experiments.  
417 (I) Immunoblot analysis of VVL IP on HeLa EGFR cells treated with siNT or siGALNT1+T2 which were stimulated  
418 with 100 ng/ml EGF over the indicated durations.

419 **References**

- 420 1. Leek JT, Jager LR. Is Most Published Research Really False? *Annual Reviews*; 2017; doi:10.1146/annurev-  
421 statistics-060116-054104
- 422 2. Ioannidis JPA. How to make more published research true. *PLoS Med.* 2014;11: e1001747.
- 423 3. Ioannidis JPA. Contradicted and initially stronger effects in highly cited clinical research. *JAMA.* 2005;294:  
424 218–228.
- 425 4. Gill DJ, Chia J, Senewiratne J, Bard F. Regulation of O-glycosylation through Golgi-to-ER relocation of  
426 initiation enzymes. *J Cell Biol.* 2010;189: 843–858.
- 427 5. Moremen KW, Tiemeyer M, Nairn AV. Vertebrate protein glycosylation: diversity, synthesis and function. *Nat*  
428 *Rev Mol Cell Biol.* 2012;13: 448–462.
- 429 6. Tran DT, Ten Hagen KG. Mucin-type O-glycosylation during development. *J Biol Chem.* 2013;288: 6921–  
430 6929.
- 431 7. Tian E, Ten Hagen KG. Recent insights into the biological roles of mucin-type O-glycosylation. *Glycoconj J.*  
432 2009;26: 325–334.
- 433 8. Tarp MA, Clausen H. Mucin-type O-glycosylation and its potential use in drug and vaccine development.  
434 *Biochim Biophys Acta.* 2008;1780: 546–563.
- 435 9. Ju T, Brewer K, D'Souza A, Cummings RD, Canfield WM. Cloning and Expression of Human Core 1  $\beta$ 1,3-  
436 Galactosyltransferase. *J Biol Chem.* 2002;277: 178–186.
- 437 10. Munkley J. The Role of Sialyl-Tn in Cancer. *Int J Mol Sci.* 2016;17: 275.
- 438 11. Springer GF. T and Tn, general carcinoma autoantigens. *Science.* 1984;224: 1198–1206.
- 439 12. Springer GF. Tn epitope (N-acetyl-d-galactosamine  $\alpha$ -O-serine/threonine) density in primary breast carcinoma:  
440 A functional predictor of aggressiveness. *Mol Immunol.* 1989;26: 1–5.
- 441 13. Ju T, Aryal RP, Kudelka MR, Wang Y, Cummings RD. The Cosmc connection to the Tn antigen in cancer.  
442 *Cancer Biomark.* 2014;14: 63–81.
- 443 14. Rodríguez E, Schettters STT, van Kooyk Y. The tumour glyco-code as a novel immune checkpoint for  
444 immunotherapy. *Nat Rev Immunol.* 2018; doi:10.1038/nri.2018.3
- 445 15. Radhakrishnan P, Dabelsteen S, Madsen FB, Francavilla C, Kopp KL, Steentoft C, et al. Immature truncated O-  
446 glyco-phenotype of cancer directly induces oncogenic features. *Proc Natl Acad Sci U S A.* 2014;111: E4066–  
447 75.
- 448 16. Yoo NJ, Kim MS, Lee SH. Absence of COSMC gene mutations in breast and colorectal carcinomas. *APMIS.*  
449 2008;116: 154–155.
- 450 17. Song K, Herzog BH, Fu J, Sheng M, Bergstrom K, McDaniel JM, et al. Loss of Core 1-derived O-Glycans  
451 Decreases Breast Cancer Development in Mice. *J Biol Chem.* 2015;290: 20159–20166.
- 452 18. Gill DJ, Tham KM, Chia J, Wang SC, Steentoft C, Clausen H, et al. Initiation of GalNAc-type O-glycosylation  
453 in the endoplasmic reticulum promotes cancer cell invasiveness. *Proc Natl Acad Sci U S A.* 2013;110: E3152–  
454 61.
- 455 19. Nguyen AT, Chia J, Ros M, Hui KM, Saltel F, Bard F. Organelle Specific O-Glycosylation Drives MMP14  
456 Activation, Tumor Growth, and Metastasis. *Cancer Cell.* 2017;32: 639–653.e6.



- 457 20. Chia J, Tham KM, Gill DJ, Bard-Chapeau EA, Bard FA. ERK8 is a negative regulator of O-GalNAc  
458 glycosylation and cell migration. *Elife*. 2014;3: e01828.
- 459 21. Frattini A, Fabbri M, Valli R, De Paoli E, Montalbano G, Gribaldo L, et al. High variability of genomic  
460 instability and gene expression profiling in different HeLa clones. *Sci Rep*. 2015;5: 15377.
- 461 22. Herbomel GG, Rojas RE, Tran DT, Ajinkya M, Beck L, Tabak LA. The GalNAc-T Activation Pathway  
462 (GALA) is not a general mechanism for regulating mucin-type O-glycosylation. *PLoS One*. 2017;12:  
463 e0179241.
- 464 23. Bard F, Chia J. Comment on “The GalNAc-T Activation Pathway (GALA) is not a general mechanism for  
465 regulating mucin-type O-glycosylation.” *PLoS One*. 2017;12: e0180005.
- 466 24. Mandel U, Hassan H, Therkildsen MH, Rygaard J, Jakobsen MH, Juhl BR, et al. Expression of polypeptide  
467 GalNAc-transferases in stratified epithelia and squamous cell carcinomas: immunohistological evaluation using  
468 monoclonal antibodies to three members of the GalNAc-transferase family. *Glycobiology*. 1999;9: 43–52.
- 469 25. Bard F, Mazelin L, Péchoux-Longin C, Malhotra V, Jurdic P. Src regulates Golgi structure and KDEL receptor-  
470 dependent retrograde transport to the endoplasmic reticulum. *J Biol Chem*. 2003;278: 46601–46606.
- 471 26. Bolte S, Cordelières FP. A guided tour into subcellular colocalization analysis in light microscopy. *J Microsc*.  
472 2006;224: 213–232.
- 473 27. van der Valk J, Bieback K, Buta C, Cochrane B, Dirks WG, Fu J, et al. Fetal Bovine Serum (FBS): Past -  
474 Present - Future. *ALTEX*. 2018;35: 99–118.
- 475 28. Parks EE, Ceresa BP. Cell surface epidermal growth factor receptors increase Src and c-Cbl activity and  
476 receptor ubiquitylation. *J Biol Chem*. 2014;289: 25537–25545.
- 477 29. Weller SG, Capitani M, Cao H, Micaroni M, Luini A, Sallèse M, et al. Src kinase regulates the integrity and  
478 function of the Golgi apparatus via activation of dynamin 2. *Proc Natl Acad Sci U S A*. 2010;107: 5863–5868.
- 479 30. Masuda H, Zhang D, Bartholomeusz C, Doihara H, Hortobagyi GN, Ueno NT. Role of epidermal growth factor  
480 receptor in breast cancer. *Breast Cancer Res Treat*. 2012;136: 331–345.
- 481 31. Sasaki T, Hiroki K, Yamashita Y. The role of epidermal growth factor receptor in cancer metastasis and  
482 microenvironment. *Biomed Res Int*. 2013;2013: 546318.
- 483 32. Summy JM, Gallick GE. Treatment for advanced tumors: SRC reclaims center stage. *Clin Cancer Res*.  
484 2006;12: 1398–1401.
- 485 33. Collins FS, Tabak LA. Policy: NIH plans to enhance reproducibility. *Nature*. 2014;505: 612–613.
- 486 34. Chia J, Goh G, Racine V, Ng S, Kumar P, Bard F. RNAi screening reveals a large signaling network  
487 controlling the Golgi apparatus in human cells. *Mol Syst Biol*. 2012;8: 629.
- 488 35. Chia J, Tham KM, Gill DJ, Bard-Chapeau EA, Bard FA. ERK8 is a negative regulator of O-GalNAc  
489 glycosylation and cell migration. *Elife*. 2014;3: e01828.
- 490 36. Nguyen AT, Chia J, Ros M, Hui KM, Saltel F, Bard F. Organelle Specific O-Glycosylation Drives MMP14  
491 Activation, Tumor Growth, and Metastasis. *Cancer Cell*. 2017;32: 639–653.e6.
- 492

493 **Supplemental figures**

494 **Fig S1. Tn staining and GALNT2 analysis in growth factor stimulated cells from Bard's lab and Tabak's lab.**

495 (A) HPL staining of cells stimulated with EGF over the indicated durations performed in Bard's lab. The Golgi is  
496 demarcated by MannII-GFP. Scale bar: 30  $\mu$ m. (B) Mander's coefficient to quantify the level of colocalization  
497 between HPL and Golgi marker MannII-GFP over time of EGF stimulation in (A). M1 represents the fraction of  
498 HPL staining overlapping the Golgi and M2 represents the fraction of Golgi overlapping HPL staining. Values were  
499 normalised with respect to unstimulated control cells (0 h). Hundreds of cells were quantified. Statistical  
500 significance (p) measured by two-tailed paired t test. \*\*, p < 0.001 relative to unstimulated cells (0 h). (C)  
501 Quantification of Mander's coefficient of GALNT2 and Golgi marker TGN in representative images provided by  
502 Tabak's group. (D) Maximum projection from representative images stained with HPL and ER marker CANX  
503 provided by Herbomel et al. Scale bar: 5  $\mu$ m. (E) Maximum projection images of ER marker CANX in Fig 1F. Scale  
504 bar: 5  $\mu$ m

505

506 **Fig S2. ERK8 depletion does not affect GALNT protein levels and occurs through EGFR pathway.**

507 (A) Immunoblot analysis of GALNT1 levels in HeLa cells depleted with ERK8 single ("siERK8 (single)) or ERK8  
508 pooled ("siERK8 (pooled)) siRNA. (B) HPL staining of ERK8 depleted HeLa cells treated with DMSO control, 10  
509  $\mu$ M Src inhibitor PP2 or 10  $\mu$ M Src Kinase Inhibitor I (SKI-I) for 24 hours. Scale bar: 30  $\mu$ m (C) HPL staining of  
510 ERK8 depleted HeLa cells ("siERK8") treated with 10  $\mu$ M EGFR inhibitor AG-1478 or DMSO control. Scale bar:  
511 30  $\mu$ m. (D) HPL staining of ERK8 depleted Skov-3 cells. Scale bar: 30  $\mu$ m. (E) Quantification of HPL intensity in  
512 (D). Statistical significance (p) measured by two-tailed paired t test. \*, p < 0.05 relative to siNT control.

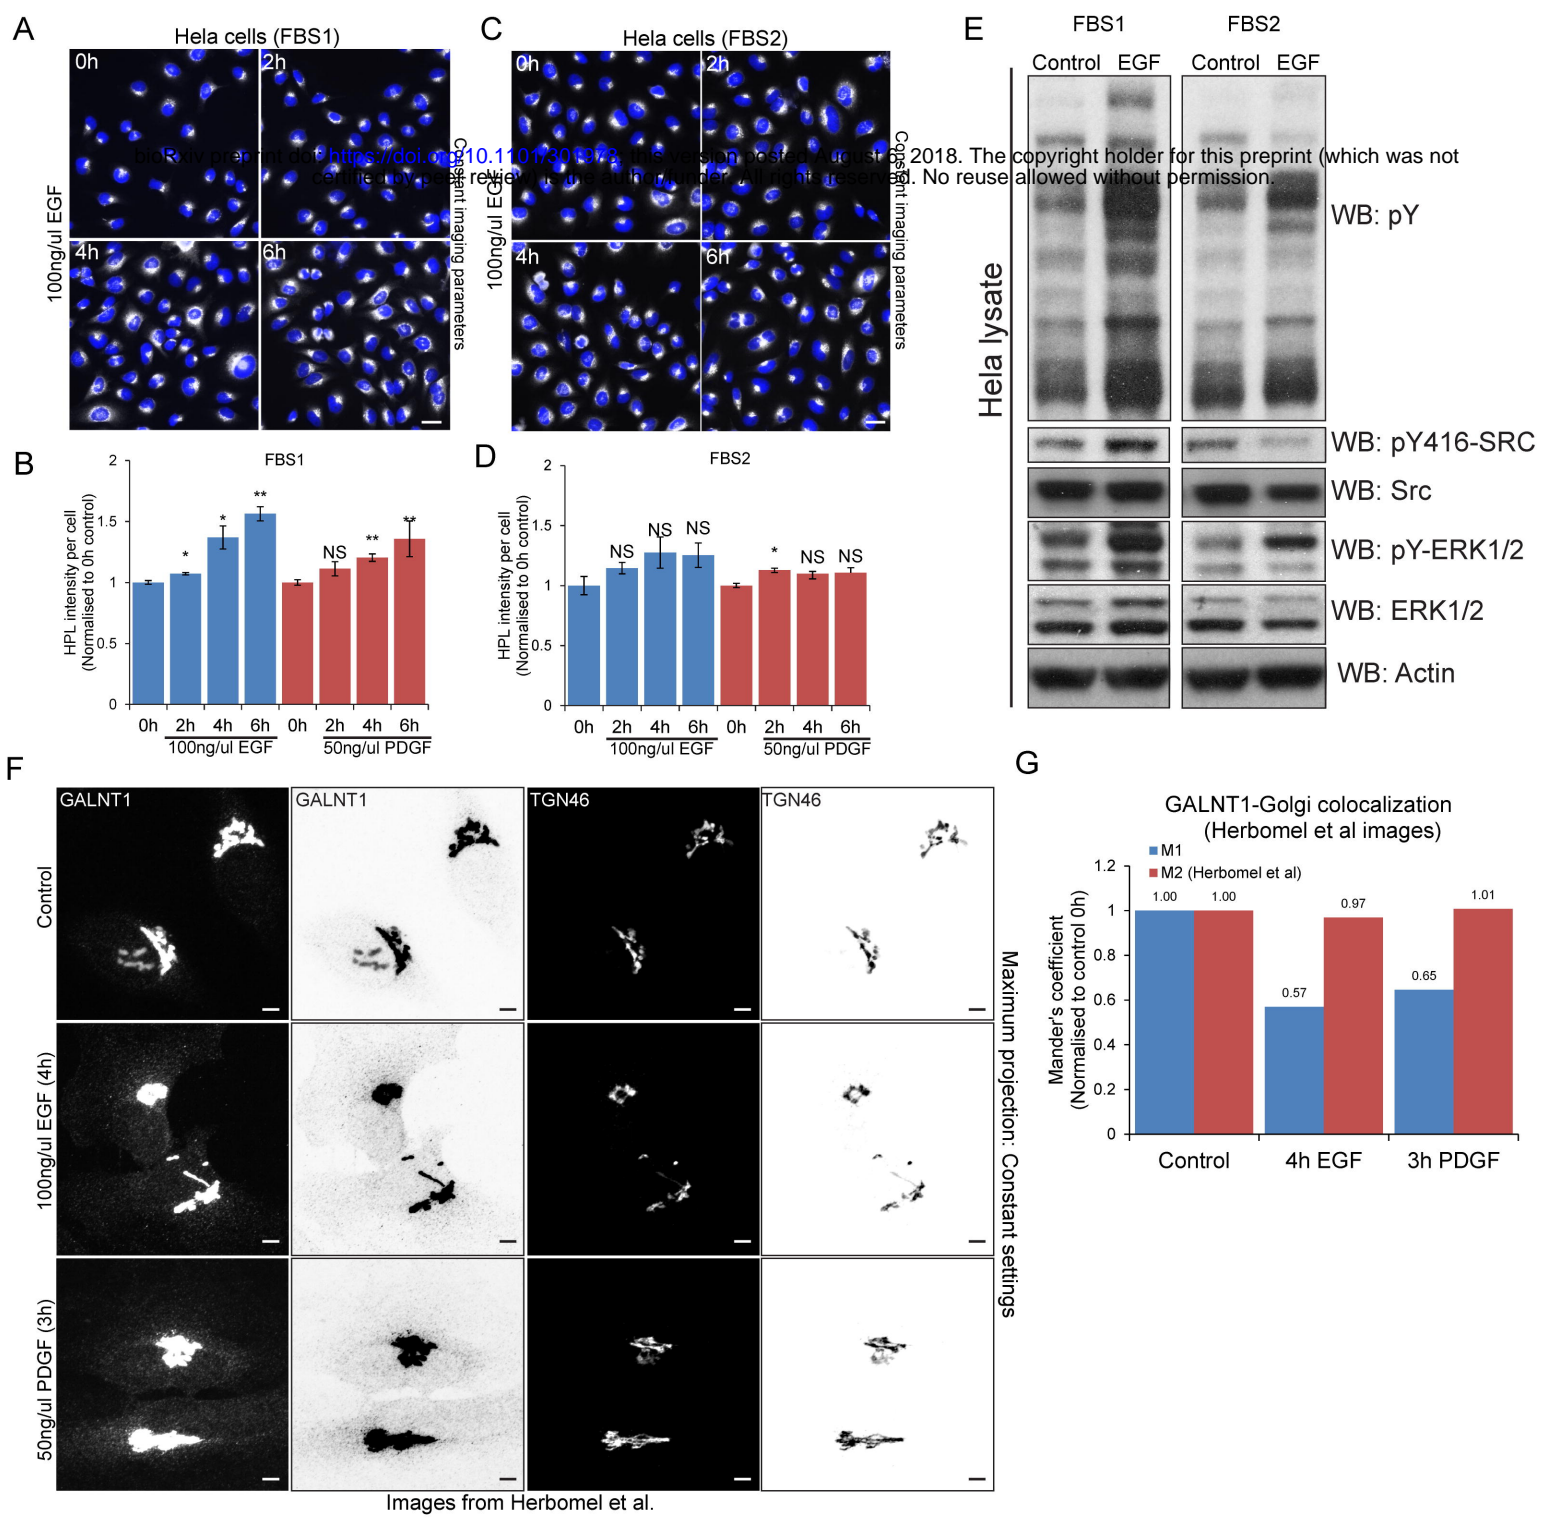

Figure 1

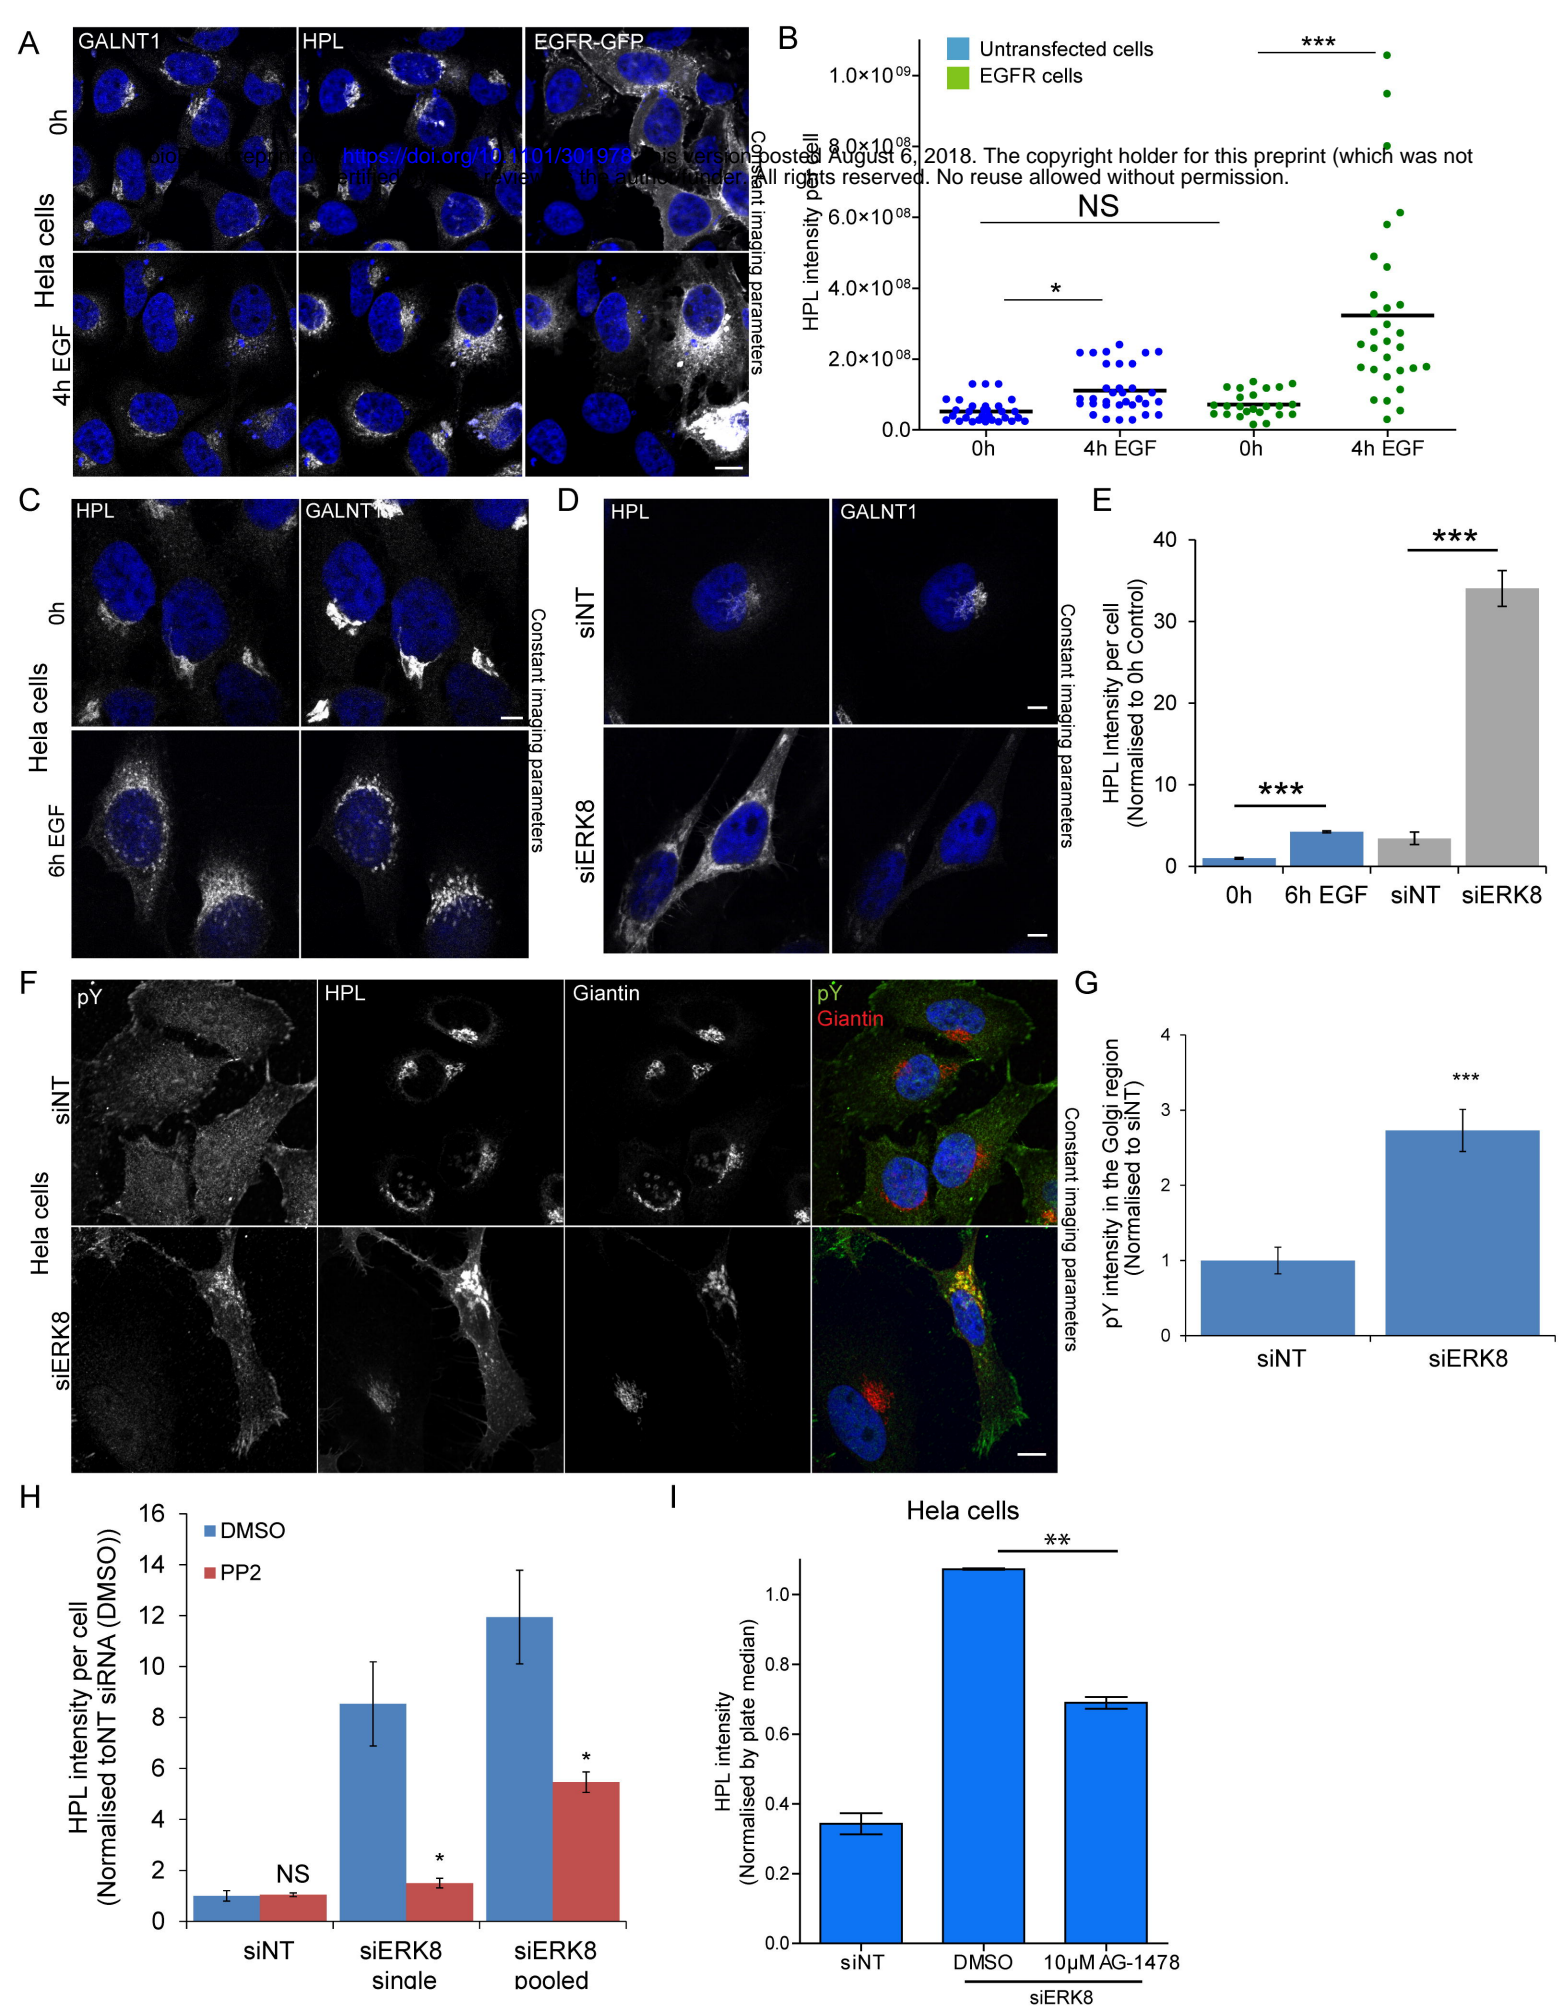

Figure 2



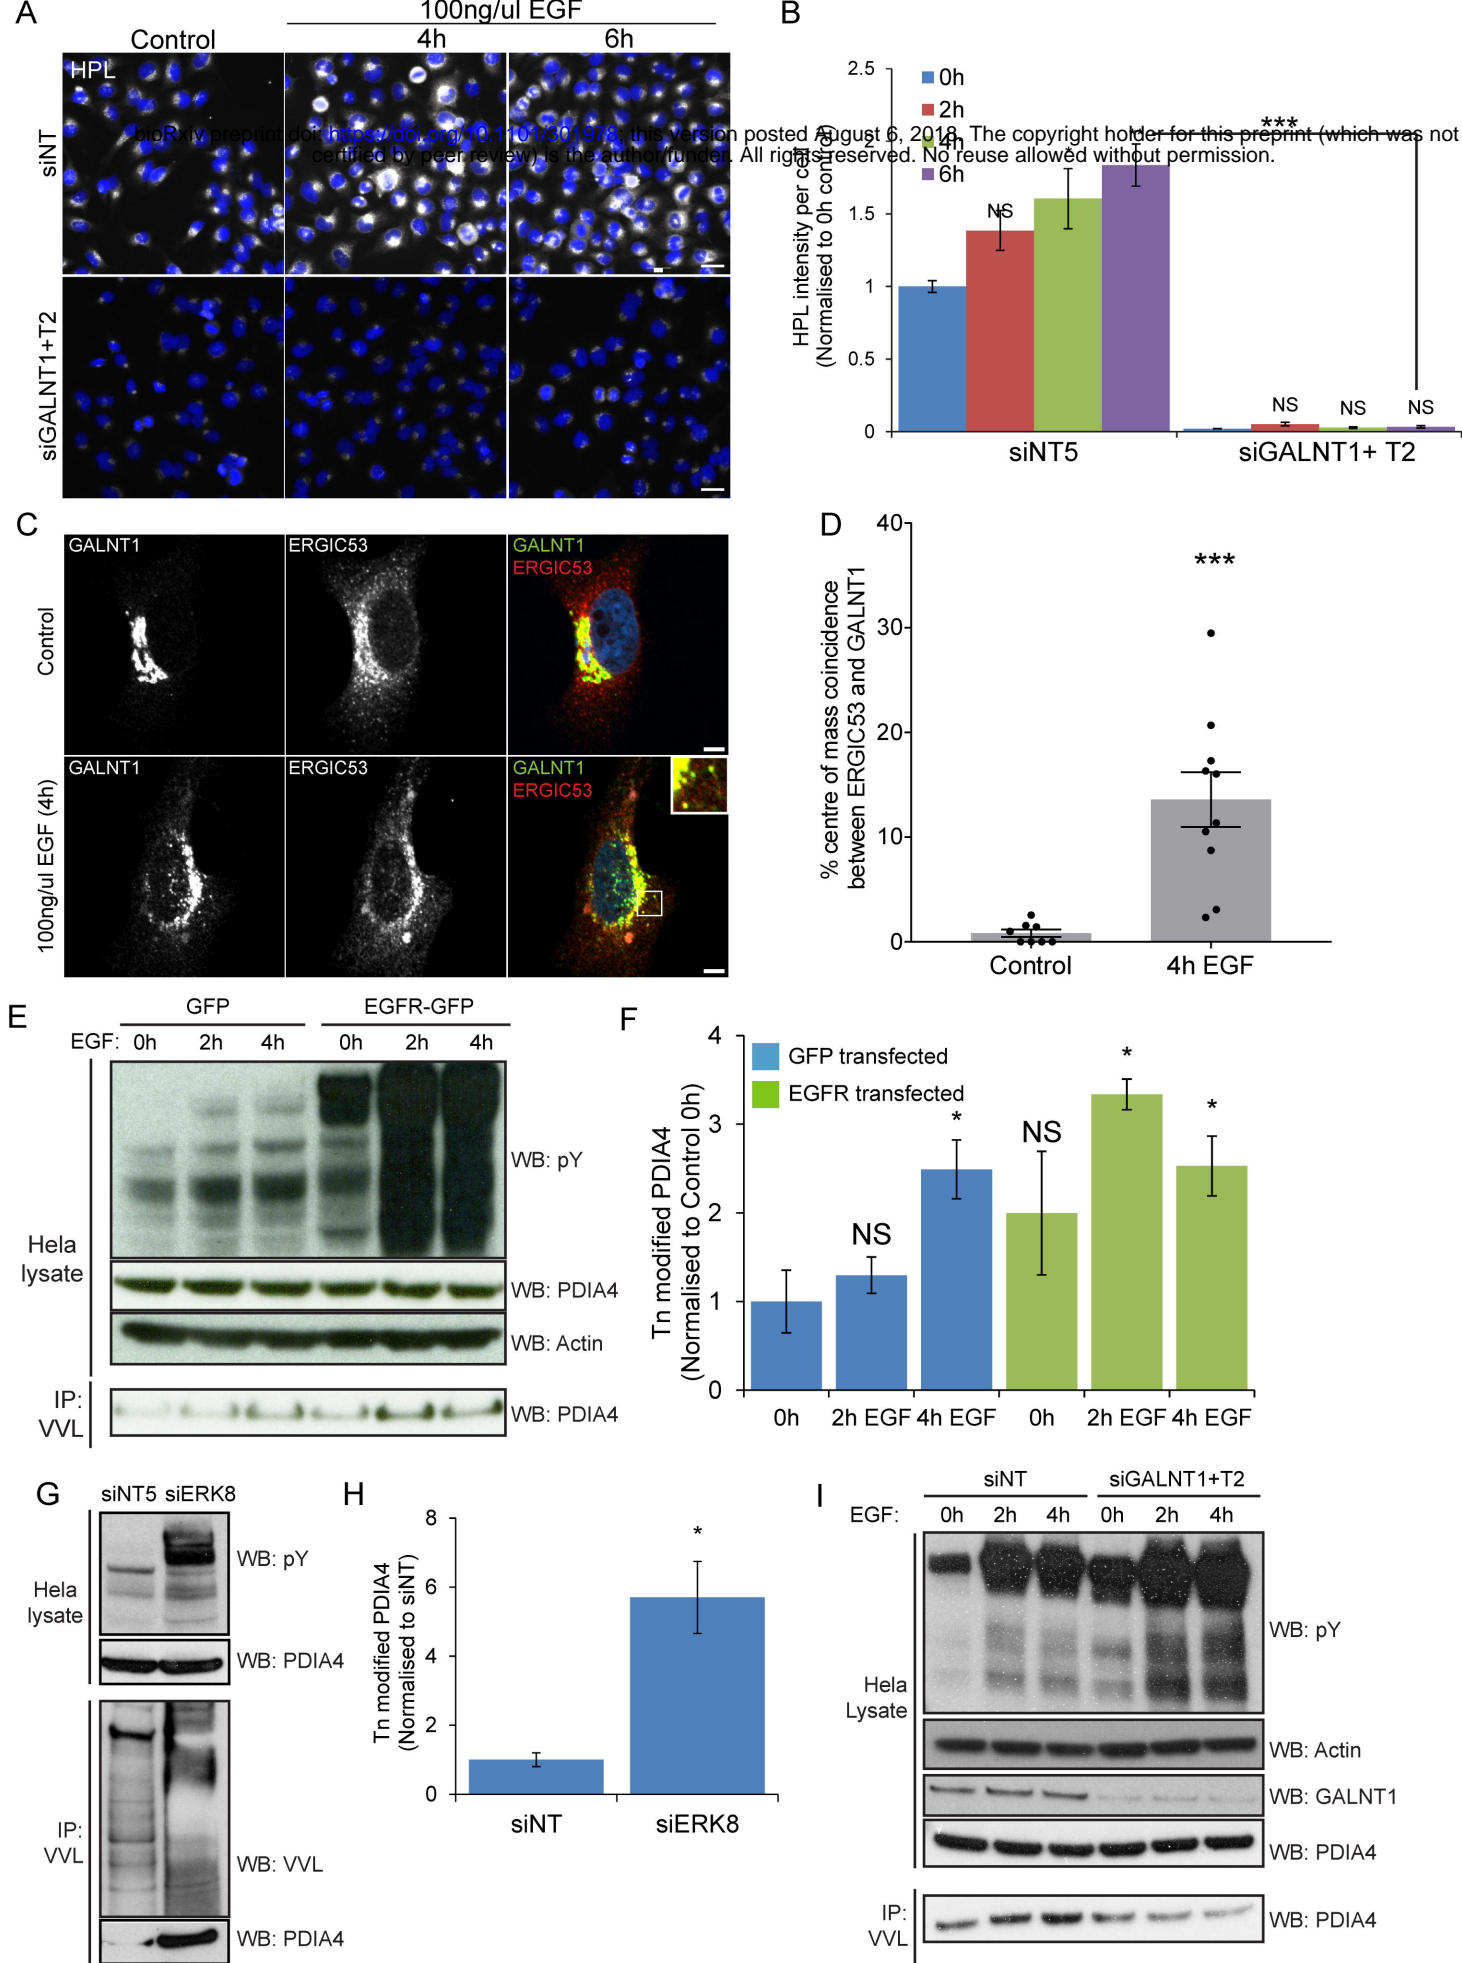

Figure 3
